# Supplementary material
Source: PubMed Central journal article supplement (PMC2547066)
Supplement: supp_7_9_1518__1.pdf [file supp_7_9_1518__1.pdf]

**Table S1. ATrx1 oligonucleotides**

| Name                    | sequence                                                         |
|-------------------------|------------------------------------------------------------------|
| <i>Hind</i> III(-)1535s | CT <b>AAGCTT</b> GCGAAGTCACCACAAAGAACG                           |
| (-)189 s                | CACTGCAGCAGAGGAGAGACATC                                          |
| <i>Xma</i> I(-)188s     | TG <b>ACCCGGG</b> ACTGCAGCAGAGGAGAGACATC                         |
| (+)2958s                | CCGACACCTTTCACAGATCTGC                                           |
| (+)4839s                | ACGCTCTTGACAATAACGTCGT                                           |
| (+)4978s                | GATGAAAAAGCGTTCGAAGAGTA                                          |
| <i>Xma</i> I(-)195a     | GT <b>CCCGGG</b> AAAAATCCGA <b>ACTCGCCGAA</b>                    |
| (+)1028a                | CGTGAGGCTTCTCGGCTGCAA                                            |
| (+)1053a                | CGCAAGACCTCCCTTTCCTC                                             |
| (+)1156a                | TTGCGCAGAGACCGAAGGATG                                            |
| (+)7318a                | GCGGA <b>ACTTGT</b> TGATGAAAGCG                                  |
| <i>Avr</i> II(+)7357a   | AG <b>CTAGG</b> TTCGGGGACCGCCAAAGAAT                             |
| (+)7695 a               | CACAGTCCATGTTCGCACCAC                                            |
| $\Delta$ 2-51s          | CCCTGTCTCTGTCTCCATGCAGCTCTCCCTAACGTCGGCC                         |
| $\Delta$ 2-51a          | GGCCGACGTTAGGGAGAGCTGCATGGAGACAGAGACAGGG                         |
| $\Delta$ 50-210s        | CTTCTCTCTTCGCTTCACCTAGACACGATTCCACCTCCTC                         |
| $\Delta$ 50-210a        | GAGGAGGTGGAATCGTGTCTAGGTGAAGCGAAGAGAGAGAAG                       |
| $\Delta$ 226-742s       | GAGCGTCGCTTTTGC <b>GCATTC</b> CTGCAGATGAGTAAAGGAGAAGA <b>ACT</b> |
| $\Delta$ 226 – 742a     | AGTTCTTCTCCTTTACTCATCTGCAGGAATGACGCAAAAGCGACGCTC                 |

Added restriction sites are shown in bold. Numbers refer to the location of the sequence relative to the start codon on the genomic DNA sequence or for the deletion oligonucleotides, to the amino acid number.
