# Supplementary material
Source: PubMed Central journal article supplement (PMC2547066)
Supplement: supp_7_9_1518__2.pdf [file supp_7_9_1518__2.pdf]

## Figure S1. Mass spectrometric coverage of immunopurified bands.

Regions identified as peptides hits are colored orange and boxed. For band 1, turquoise marks the site of the first amino acid of each exon. Yellow marks amino acids that differ from the genome strain ME49. Pink marks a mass spec peptide annotated in ToxoDB Genome Browser that was not identified in our peptide sequences, but was identified by the Einstein high throughput proteomics project. The RH amino acid sequence is shown in Band 1 and the ME49 sequence in the others.

### Band 1

MAPDSCRDPD VGAPNNGRSL KEVSSSFCTT SSLFSRSLLL FLLFSLFASP RQLSLTSAIS  
 LEPSPGSPAA AOVSSGVAPK PVEKESGNGG QVKVHLKRDE AGRPLPVSA SLFAAEKPHE  
 EEEREVLRVG VDAGDSRREK RAVEPTRMLA SIDPQHPSVS AOVVSPAPSS SLTAPPTARP  
 RDEGNNTCVR NNETCQRRER YAEKSIQRHR HDSTSSRESV AFASFGSSKN SFATAYAPFD  
 DEDEEGALAH LKLNKVKTAVS CPAAKILLGI SGVVALGTLG IKYTRNVLRR RRR>EGLQRPP  
 TPFTDLLGHV LLKR>ERKHA AETR>ELATGD VLGKPGSVTA LYFSGRGVEE MLQTRGYQPF  
 TPRLER>IIVEG CR>ERGQELNV VYLSADADSS DAEKHFSDMS WYALPFDDAP GQAR>IHRLFR  
 KFRVSTLPHV VLLDSNARV>L NSHAYASMIV RPTAFPWKKQ TPAELLGDAF VSGEGQKVGK  
 DALDNNVVGI YFSASWCPPC QAFTPCLVEA LKGWKEQKGD VSVVFSNDR DEKAFEEYFK  
 KMEGFVAIPF ADTTRALLQ EALNVR>SLPT LVWLSK>EY LTR>RGVPHVL EDPEGRNFPW  
 KDKDVNDVSD SVEGIADEPA LILFMEHLDE KAKEEQEKAL EEAMQALQSQ KNDGGVPPLV  
 RLFTA<sup>R</sup>SLSP R>SIALRRICR QDPPDADKEK KGPIL<sup>T</sup>IVDL LDQSYFTALQ EPGRIFSADE  
 IVAFINK<sup>R</sup>FRR EELERNSLAV PE

### Band 2

MAPDSCRDPD VGAPNNGRSL KEVSSSFCTT SSLFSRSLLL FLLFSLFASP RQLSLTSAIS  
 LEPSPGSPAA AOVSSGVAPT PVEKESGNGG QVKVHLKRDE AGRPLPVSA SLFAAEKPHE  
 EEEREVLRVG VDAGDSRREK RAVEPTRMLA SIDPQHPSVS AOVVSPAPSS SLTAPPTARP  
 RDEGNNTCVR NNETCQRRER YAEKSIQRHR HDSTSSRESV AFASFGSSKN SFATAYAPFD  
 DEDEEGALAH LKLNKVKTAVS CPAAKILLGI SGVVALGTLG IKYTRNVLRR RRR>EGLQRPP  
 TPFTDLLGHV LLKR>ERKHA AETR>ELATGD VLGKPGSVTA LYFSGRGVEE MLQTRGYQPF  
 TPRLER>IIVEG CR>ERGQELNV VYLSADADSS DAEKHFSDMS WYALPFDDAP GQAR>IHRLFR  
 KFRVSTLPHV VLLDSNARV>L NSHAYASMIV RPTAFPWKKQ TPAELLGDAF VAGEGQK>VGK  
 DALDNNVVGI YFSASWCPPC QAFTPCLVEA LKGWKEQKGD VSVVFSNDR DEKAFEEYFK  
 KMEGFVAIPF ADTTRALLQ EALNVR>SLPT LVWLSK>EY LTR>RGVPHVL EDPEGRNFPW  
 KDKDVNDVSD SVEGIADEPA LILFMEHLDE KAKEEQEKAL EEAMQALQSQ KNDGGVPPLP  
 RLFTA<sup>R</sup>SLSP R>SIALRRICR QDPPDADKEK KGPIL<sup>T</sup>IVDL LDQSYFTALQ EPGRIFSADE  
 IVAFINK<sup>R</sup>FRR EELERNSLAV PE

### Band 3

MAPDSCRDPD VGAPNNGRSL KEVSSSFCTT SSLFSRSLLL FLLFSLFASP RQLSLTSAIS  
 LEPSPGSPAA AOVSSGVAPT PVEKESGNGG QVKVHLKRDE AGRPLPVSA SLFAAEKPHE  
 EEEREVLRVG VDAGDSRREK RAVEPTRMLA SIDPQHPSVS AOVVSPAPSS SLTAPPTARP  
 RDEGNNTCVR NNETCQRRER YAEKSIQRHR HDSTSSRESV AFASFGSSKN SFATAYAPFD  
 DEDEEGALAH LKLNKVKTAVS CPAAKILLGI SGVVALGTLG IKYTRNVLRR RRR>EGLQRPP  
 TPFTDLLGHV LLKR>ERKHA AETR>ELATGD VLGKPGSVTA LYFSGRGVEE MLQTRGYQPF  
 TPRLER>IIVEG CR>ERGQELNV VYLSADADSS DAEKHFSDMS WYALPFDDAP GQAR>IHRLFR  
 KFRVSTLPHV VLLDSNARV>L NSHAYASMIV RPTAFPWKKQ TPAELLGDAF VAGEGQK>VGK  
 DALDNNVVGI YFSASWCPPC QAFTPCLVEA LKGWKEQKGD VSVVFSNDR DEKAFEEYFK  
 KMEGFVAIPF ADTTRALLQ EALNVR>SLPT LVWLSK>EY LTR>RGVPHVL EDPEGRNFPW  
 KDKDVNDVSD SVEGIADEPA LILFMEHLDE KAKEEQEKAL EEAMQALQSQ KNDGGVPPLP

RLFTAKSLSP RSIALRRICR QDPPDADKEK **KGPILTIVDL LDQSYFTALQ EPGRIFSADE**  
**IVAFINK**FRR EELERNSLAV PE

Bands 4/5

MAPDSCRDPD VGAPNGRGS L KEVSSSFCTT SSLFSRLSLL FLLFSLFASP RQLSLTSAIS  
LEPSPGSPAA AQVSSGVAPT PVEKESGNGG QVKVHLKRDE AGRPLPVSA SLFAAEKPHE  
EEEREVLVRG VDAGDSRREK RAVEPTRMLA SIDPQHPSVS AQVVSPAPSS SLTAPPTARP  
RDEGNNTCVR NNETCQRREK YAEKSIQRHR HDSTSSR **ESV AFASFGSSKN SFATAYAPFD**  
**DEDEEGALAH LK**NKVKTAVS CPAAKILLGI SGVVALGTLG IKYTRNVLRR RRR **EGLQRPP**  
**TPFTDLLGHV LLKR**ERKHA AETR **ELATGD VLGKPGSVTA LYFSGR**GVEE MLQTRGYQPF  
TPRLERIVEG CRER **GOELNV VYLSADADSS DAEK**HFS DMS WYALPFDDAP GQARIHRLFR  
KFR **VSTLPHV VLLDSNARVL NSHAYASMIV RPTAFPWK**KQ TPAELLGDAF VAGEGQKVGK  
DALDNNVGI YFSASWCPPC QAFTPKLVEA LKGWKEQGK **D VSVVFSNDR DEK**AFE EYFK  
KMEGFVAIPF ADTTR **RALLQ EALNVR**SLPT LVWLSKEGEI LTR **RGVPHVL EDPEGRNFPW**  
**KDKDVNDVSD SVEGIADEPA LIL**FMEHLDE KAKEEQEKAL EEAMQALQSQ KNDGGVPLP  
RLFTAKSLSP RSIALRRICR QDPPDADKEK **KGPILTIVDL LDQSYFTALQ EPGRIFSADE**  
**IVAFINK**FRR EELERNSLAV PE
